# Supplementary material
Source: PubMed Central journal article supplement (PMC1955724)
Supplement: plntcell_tpc.106.048629_2.pdf [file plntcell_tpc.106.048629_2.pdf]

**At3g22960, PK<sub>p</sub>-α, 67% coverage**

**msqsiqfstpshtphllhphsqfnrplssisfrfrplttikytsira**  
sssspspdlldssssssqvlspngtgavksdersvavattdts  
gievdtvteaekengfrstrrtklictigpatcgfeqlealavggmnvarl  
nmchgtrdwhrgvirsvrrlneekgfavaimmdtegeihmgdlgg  
easakaedgenvtftvrafdsrpertisvsydgfaedvrvgdellvd  
ggmvrfeiekigpdkclctdpgllpranltfwrtdgslvrenampti  
sskdwlididfgiaegvdfiavsvksaevinhksylaarsrggeigvia  
kiesidsltnleeiilasdgamvargdlgaqipleqvpaqqrivqvra  
lnkpivasqllesmieypttraevadvseavrqrdsalmlsgesa  
mgqfpdkaltvrtvslrierwwrekrhesvplqaignsfsdkiseeic  
nsaakmannlgvdavfvyttsghmaslvsrcrpdcpifattttsvrrrl  
nlqwgliplrfsfddmesnlkntfslksrgmiksgdlviavsdmlqsi  
qvmnvp

**At5g52920, PK<sub>p</sub>-β<sub>1</sub>, 21 % coverage**

**maqvvatrsiqgsmispnggsvstrsekllkpasfavkvlgne**  
**akrsgrvsvrrrvdttvrs**arvetevipvspedvnpreeqlerlle  
mqqfgdtsvgmwskpvrktkivctvgpstntremiwlkiaeagmn  
varmnmshgdhashkkvidlvkeynaqtkdntiaimldtkgpevrs  
gdllppimldpgqefttiergvstpscvsvnyddfndveagdmllv  
dggmmsfmvsktkdsvkcevvdggelksrrhlnvrgksatpSITE  
kdwedikfvenkvdfyavsvkdaqvhelkkylnsgadihvivki  
esadsipnlhsiitasdgamvargdlgaelpieevpilqeeiinlcrsm  
gkavivatnmlsmivhpttraevsdiaivregadavmlsgetah  
gkfpkkaagvmhtvalrteatitsgempplgqafknhmsemfayh  
atmmsntlgtstvvftrtgfmailshyrpsgtiyafnekkqqrlalyqg  
vcpiymeftddaetfanalatllkqgmvkkggeeiaivqsqtqpiwrs  
qsthniqvrkv

**At1g32440, PK<sub>p</sub>-β<sub>2</sub>, 10% coverage**

**maaygqissgmtvdpqvlsssrnigvslsplrtligagrvtsti**  
**slrqcslsvrsiki** sedsrpkayaengafdvglvdsyyrladsrts  
sndsrrktkivctigpssssremiwlkiaeagmnvarlnmshgdhas  
hqitidlvkeynsfvdkaiaimldtkgpevrgdvpqpfleegqefnft  
ikrgvslkdtvsvnyddfndvevgdillvdggmmslavksktsdlvk  
cvvidggelqsrhlnvrgksatpSITEkdwedikfvdnqvdfyavs  
fvkdakvhelknylktcsadisvivkiesadsiknlpsiisacdgamv  
argdlgaelpieevpllqeeiirrcrsihkpvivatnmlsmihpttra  
evsdiaivregadaimlsgetahgkfpkavnmhtvalrteaspv  
rtsasrttaykghmgqmfaahasimantlssplivftrtgsmavllshyr  
psatifaftnqrimqrlalyqgvmpiyamefsddaedyarsikllqden  
mkegqhvltlvqsgsqpiwreesthliqvrkikigg

**Supplemental Figure 2.** Protein sequences, predicted transit peptides, and proteomics coverage of PK<sub>p</sub>-α, PK<sub>p</sub>-β<sub>1</sub>, and PK<sub>p</sub>-β<sub>2</sub>. Gene Loci, encoded subunit, and percent coverage by proteomics are listed. ChloroP predicted chloroplast transit peptides are in bold. Peptide fragments identified by proteomics are highlighted in gray.
