# Supplementary material
Source: PubMed Central journal article supplement (PMC1955724)
Supplement: plntcell_tpc.106.048629_4.pdf [file plntcell_tpc.106.048629_4.pdf]

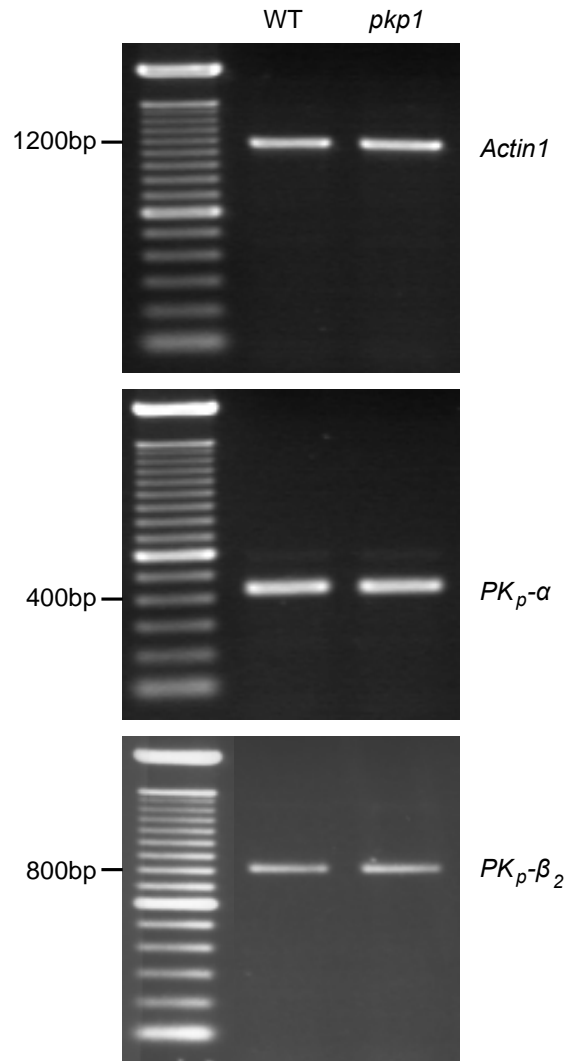

**Supplemental Figure 4.** Reverse transcriptase PCR analysis of  $PK_p\text{-}\alpha$  and  $PK_p\text{-}\beta_2$  gene expression in 11 DAF seeds of the *pkp1* and WT background. *Actin1* (At2g37620) is the control. WT, wild type.
